# Supplementary material for: A microfluidic approach to study the effect of mechanical stress on erythrocytes in sickle cell disease
Source: Royal Society of Chemistry journal article supplement (doi:10.1039/c8lc00637g), 2018-01-01
Supplement: c8lc00637g8.pdf [file c8lc00637g8.pdf]

### Video legends

**Video 1.** Red cells from a healthy donor suspended at 30% hematocrit and flowing through the microfluidic device. Video recorded at 4000 fps and played at 5 fps.

**Video 2.** Red cells from a patient with sickle cell disease suspended at 30% hematocrit and flowing through the microfluidic device. Video recorded at 4000 fps and played at 5 fps.

**Video 3.** Sickle red cells from the low dense fraction suspended at 30% hematocrit and flowing through the microfluidic device. Video recorded at 4000 fps and played at 5fps.

**Video 4.** Sickle red cells from the high dense fraction suspended at 30% hematocrit and flowing through the microfluidic device. Different flow rates are observed in the 3 channels, with a total blockade of the middle channel. Video recorded at 4000 fps and played at 5 fps.

**Video 5.** An irreversibly sickled cell aligning horizontally along the centreline of the channel and flowing through the restriction zone without deforming. Video recorded at 4000 fps and played at 5 fps.

**Video 6.** An irreversibly sickled cell facing the 5  $\mu\text{m}$  restriction and bending to flow through. Video recorded at 4000 fps and played at 5 fps.

**Video 7.** Trapping of an irreversibly sickled cell in the 10  $\mu\text{m}$  section after reduction of the luminal diameter by adhering leukocytes. Video recorded at 4000 fps and played at 5 fps.
